# Supplementary material for: Cooling Performance of TiO2-Based Radiative Cooling Coating in Tropical Conditions
Source: PubMed Central journal article supplement — ACS Omega. 2024 Dec 4;9(50):49494–502. doi: 10.1021/acsomega.4c07223 (PMC11656601; doi:10.1021/acsomega.4c07223), 2024-12-04
Supplement: ao4c07223_si_001.pdf [file ao4c07223_si_001.pdf]

## Supporting information

### Cooling performance of TiO<sub>2</sub> based radiative cooling coating in tropical conditions

Bhrihu Rishi Mishra<sup>†</sup>, Sreerag Sundaram<sup>†</sup>, Karthik Sasihithlu<sup>\*</sup>

Department of Energy Science and Engineering, Indian Institute of Technology Bombay,  
Powai, Mumbai 400076, Maharashtra, India

<sup>†</sup> joint first authors \* Corresponding author

E-mail address: ksasihithlu@iitb.ac.in (Karthik Sasihithlu)

## S1 Design of paint coating

The design of a paint coating involves optimizing several parameters, including the particle's radius, volume fraction, and coating thickness. To model the radiative properties of the coating, we rely on the Kubelka-Munk (KM) theory<sup>[1-3]</sup> and a semi-analytical technique<sup>[4]</sup>. The design process proceeds in two stages:

- The KM theory<sup>[1-3]</sup> is first employed to determine the optimal radius for the spherical TiO<sub>2</sub> pigment particles.
- With the optimized pigment particle size as a given input, the pigment volume fraction is fine-tuned using our proprietary semi-analytical technique<sup>[4]</sup>.

The complex refractive indices of TiO<sub>2</sub> and PDMS used in the simulation are given in Fig. S1. In the first stage the pigment volume fraction and coating thickness are kept constant at 5% and 1 mm, respectively. This low volume fraction avoids any dependent scattering, and the larger thickness ensures that reflective performance isn't affected by variations in its depth. Since TiO<sub>2</sub> absorbs in the ultraviolet range up to 0.39  $\mu\text{m}$ , all weighted reflectivity ( $R = \int I_{\text{AM1.5}}(\lambda)R(\lambda)d\lambda / \int I_{\text{AM1.5}}(\lambda)d\lambda$ , where  $I_{\text{AM1.5}}(\lambda)$  is the spectral solar irradiance<sup>[5]</sup>) calculations aimed at optimizing design parameters are carried out over the 0.39–3  $\mu\text{m}$  spectrum. The weighted reflectivity values for different radii are shown in Fig. S2a. The weighted reflectivity of TiO<sub>2</sub>/PDMS coating for pigment radius 0.25  $\mu\text{m}$  is maximum and thus this value is considered for the optimization of volume fraction.

In the subsequent stage, we employ the semi-analytical methodology detailed in<sup>[4]</sup> to determine the optimal volume fraction  $f$  of the scattering pigment. The results are presented in Fig. S2b, which shows the calculated reflectivity of the coating for varying  $f$ . Coatings with  $f = 15\%$  and  $20\%$  show similar performance with  $R_{\text{solar}} = 96.5\%$  and  $97.0\%$ , respectively. Thus,  $15\%$  pigment volume fraction is considered for the development of paint. Moreover, when examining the  $15\%$  volume fraction coating across different thicknesses, it becomes evident that beyond the 250-300  $\mu\text{m}$  mark, any increment in reflectivity is marginal.

## S2 Calculation of atmospheric transmittance using MODTRAN

The atmospheric transmittance calculation is done using MODTRAN which takes precipitable water vapour (PWV) as an input. The PWV (or total water column) is related to the relative humidity (RH) and ambient temperature. We adopt a method developed by Dong et al.<sup>[6]</sup> to calculate PWV from RH and ambient temperature. First, absolute humidity (AH) is evaluated in terms of RH and ambient temperature using the following expression

$$\text{AH} = k \text{RH} T^{a-1} 10^{c+b/T}, \quad (1)$$

where, AH has units  $10^{-3}\text{g cm}^{-3}$ ,  $T$  has units of Kelvin and the coefficients  $a = -4.9283$ ,  $b = -2937.4$ ,  $c = 23.5518$  and  $k = 0.21668 \text{ g K bar}^{-1} \text{ cm}^{-3}$ . Mumbai being a tropical region, the water column profile of the tropical atmosphere used in MODTRAN is selected to calculate

PWV from AH. As mentioned by Dong et al.<sup>[6]</sup>, the specific density of precipitable water vapour ( $= AH \times 10^5$ ) is calculated having its units as  $[g\text{ cm}^{-2}\text{ km}^{-1}]$ . It is then scaled for the entire atmospheric layer using the default distribution of the tropical atmosphere. The sum of the density of precipitable water vapour of all the layers will give the total PWV of the atmosphere.

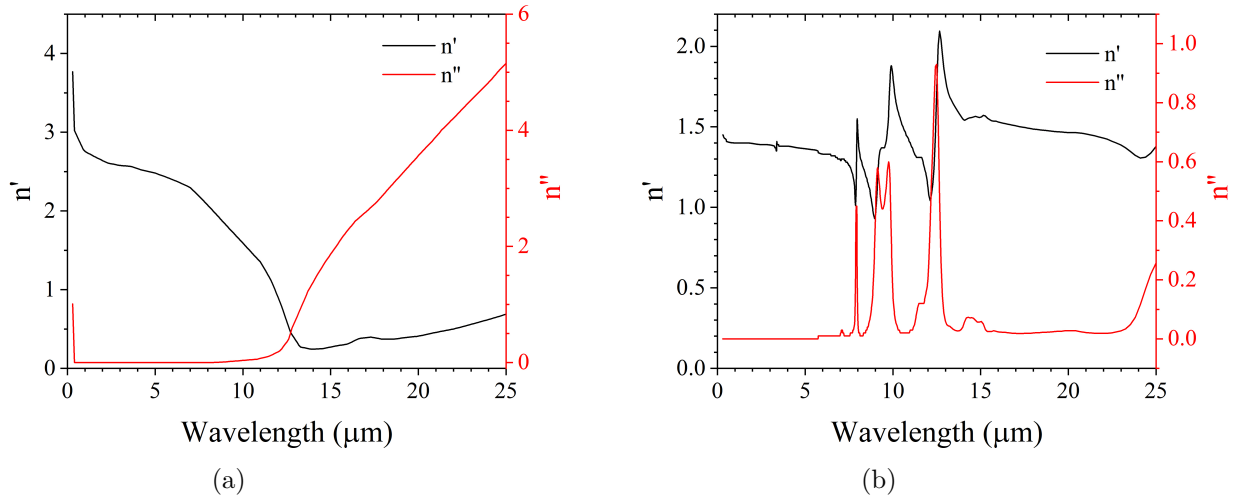

Figure S1: (a) Complex refractive index ( $n' + in''$ ) of  $\text{TiO}_2$ <sup>[7]</sup>. (b) Complex refractive index ( $n' + in''$ ) of PDMS<sup>[8,9]</sup>.

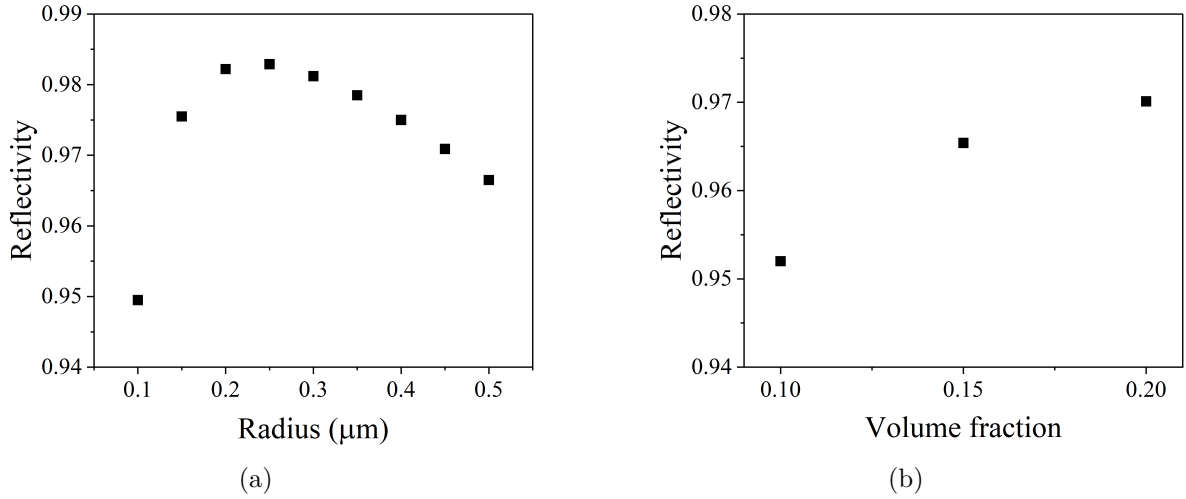

Figure S2: Reflectivity of  $\text{TiO}_2/\text{PDMS}$  coating for (a) various radius ( $r$ ) of particles calculated using Kubelka Munk theory<sup>[1–3]</sup>, keeping  $f$  ( $=5\%$ ) and  $L$  ( $=1$  mm) constant, and (b) various volume fractions calculated using semi-analytical technique<sup>[4]</sup> keeping  $r$  ( $=0.25$   $\mu\text{m}$ ) and  $L$  ( $=300$   $\mu\text{m}$ ) constant.

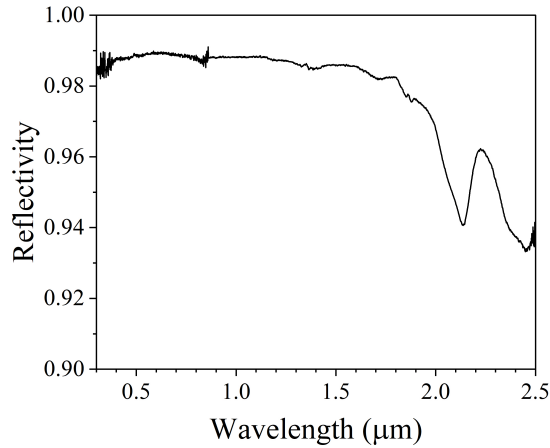

Figure S3: Reflectivity of the spectralon reflectance standard. Spectralon reflectance standard is used as a baseline correction to measure the reflectivity of the coating using UV-vis-NIR spectrometer. The obtained relative reflectivity is then multiplied by the reflectivity spectrum of spectralon reflectance standard to obtain the absolute reflectivity of the coating.

## References

- [1] P. Kubelka. New contributions to the optics of intensely light scattering materials. Part I. *J. Opt. Soc. Am.*, 38:448–457, 1948.
- [2] M. Quinten. The color of finely dispersed nanoparticles. *Appl. Phys. B*, 73:317–326, 2001.
- [3] R. Molenaar, J.J. ten Bosch, and J.R. Zijp. Determination of kubelka-munk scattering and absorption coefficients by diffuse illumination. *Appl. Opt.*, 38:2068–2077, 1999.
- [4] B.R. Mishra, N.J. Varghese, and K. Sasihithlu. Semi-analytical technique for the design

- of disordered coatings with tailored optical properties. *Optics Express*, 31(6):10201–10216, 2023.
- [5] ASTM International. ASTM G173-03, Standard Tables for Reference Solar Spectral Irradiances: Direct Normal and Hemispherical on 37° Tilted Surface, 2012.
- [6] M. Dong, N. Chen, X. Zhao, S. Fan, and Z. Chen. Nighttime radiative cooling in hot and humid climates. *Optics express*, 27(22):31587–31598, 2019.
- [7] E. D. Palik. *Handbook of Optical Constants of Solids*. Academic Press, 1998. ISBN 0-12-544420-6.
- [8] X. Zhang, J. Qiu, X. Li, J. Zhao, and L. Liu. Complex refractive indices measurements of polymers in visible and near-infrared bands. *Appl. Opt.*, 59:2337–2344, 2020.
- [9] X. Zhang, J. Qiu, J. Zhao, X. Li, and L. Liu. Complex refractive indices measurements of polymers in infrared bands. *J. Quant. Spectrosc. Radiat. Transf.*, 252:107063, 2020.
